# Supplementary material for: SNPs within microRNA binding sites and the prognosis of breast cancer
Source: publisher site journal article supplement (doi:10.18632/aging.202612), 2021-02-26
Supplement: Supplementary file [file aging-v13i5-202612-supplementary-material-SD1.pdf]

**SUPPLEMENTARY FIGURES**

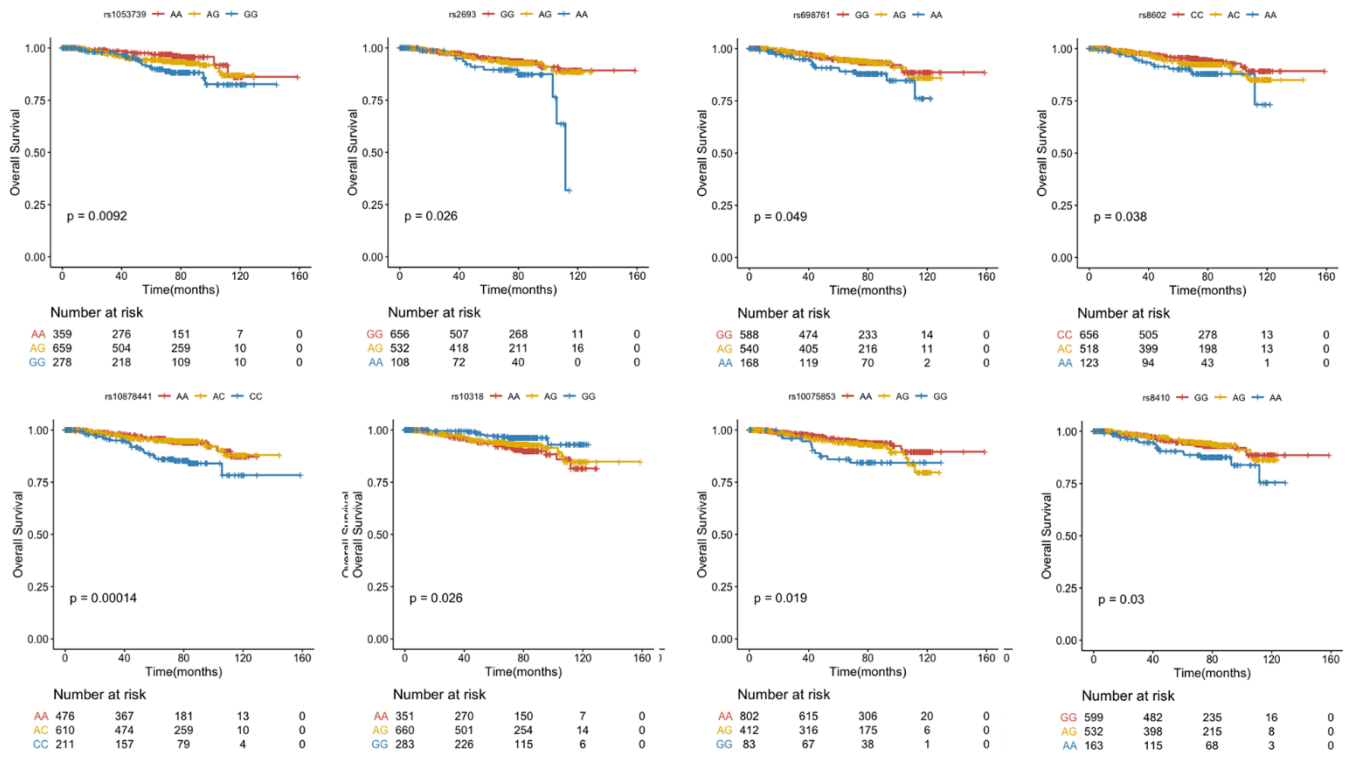

**Supplementary Figure 1. Association between 8 SNPs and breast cancer OS in stage I.**

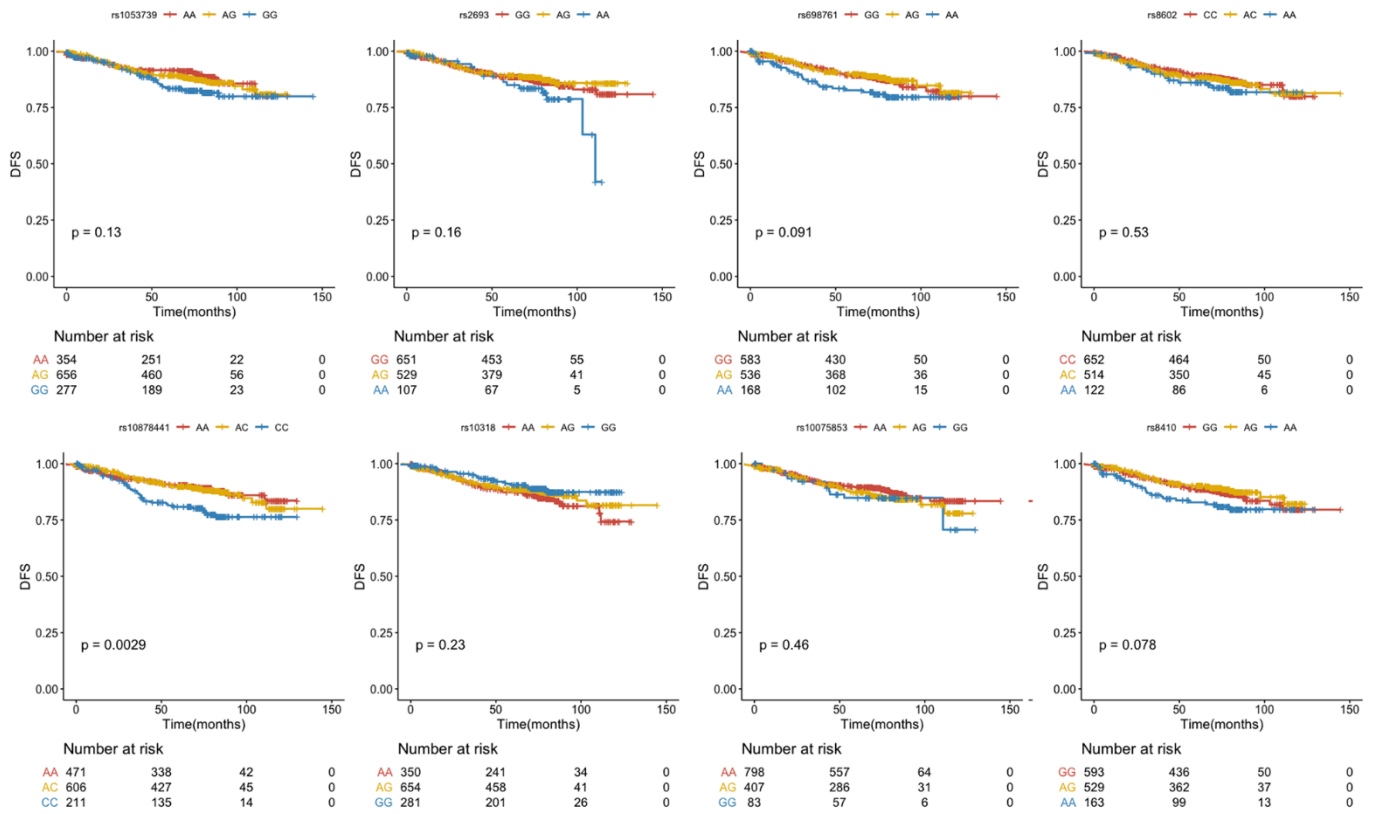

Supplementary Figure 2. Association between 8 SNPs and breast cancer DFS in stage I.

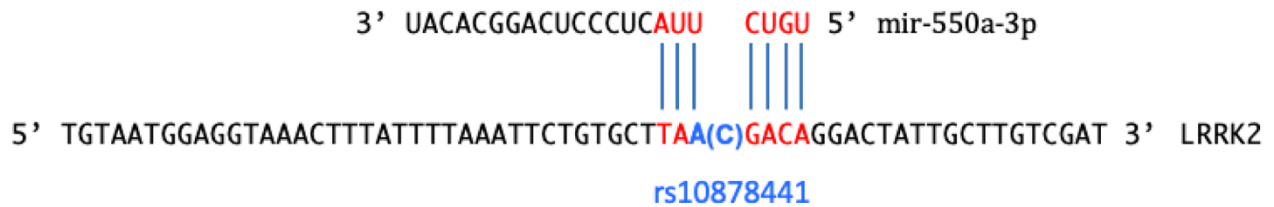

Supplementary Figure 3. The duplex structure of hsa-miR-550\* and the 3'UTR of LRRK2 gene.

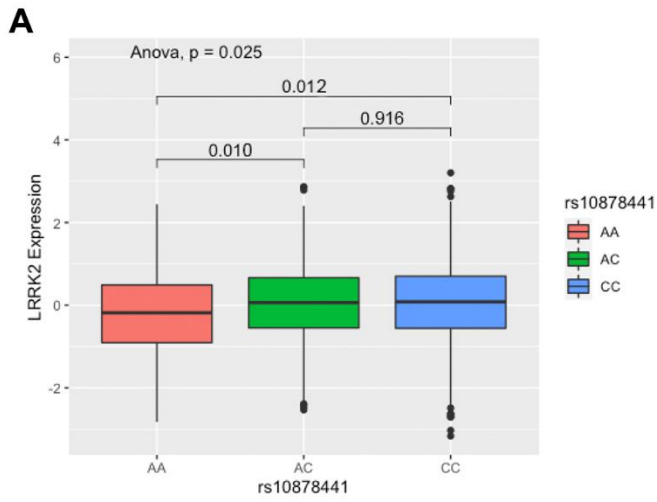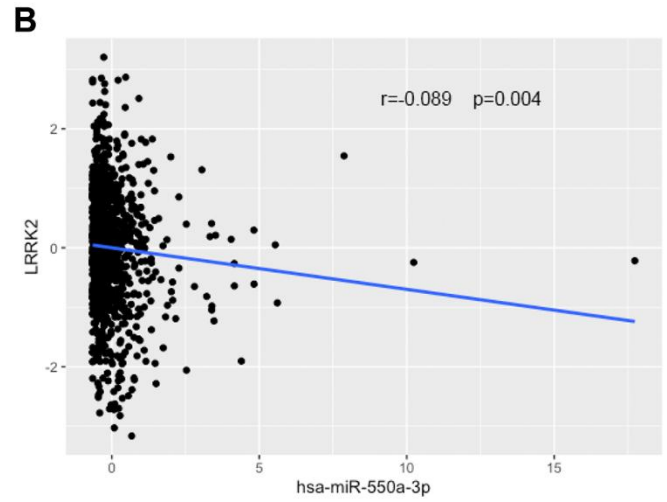

**Supplementary Figure 4. Expression analysis of TCGA data.** (A) The relationship between rs10878441 and LRRK2 gene expression. (B) The relationship between the expression of has-miR-550a-3p and the expression of LRRK2.
